# Supplementary material for: A Synthetic Analog of the Mineral Ivanyukite: Sorption Behavior to Lead Cations
Source: MDPI journal article supplement (doi:10.3390/cryst12030311), 2022-02-23
Supplement: s1 [file s1]

Supplementary materials

A Synthetic Analogue of the Mineral Ivanyukite: Sorption Behavior to Lead Cations

Gleb O. Samburov <sup>1,\*</sup>, Galina O. Kalashnikova <sup>2</sup>, Taras L. Panikorovskii <sup>1</sup>, Vladimir N. Bocharov <sup>3</sup>, Aleksandr G. Kasikov <sup>4</sup>, Ekaterina A. Selivanova <sup>2,5</sup>, Ayya V. Bazai <sup>2,5</sup>, Daria S. Bernadskaya <sup>6</sup>, Viktor N. Yakovenchuk <sup>2,4</sup> and Sergey V. Krivovichev <sup>2</sup>

**Table S1.** Fractional Atomic Coordinates ( $\times 10^4$ ) and Equivalent Isotropic Displacement Parameters ( $\text{\AA}^2 \times 10^3$ ) for Pb-exchanged ivanyukite.  $U_{eq}$  is defined as 1/3 of the trace of the orthogonalised  $U_{ij}$  tensor.

| Atom | <i>x</i> | <i>y</i> | <i>z</i> | U(eq)    |
|------|----------|----------|----------|----------|
| Ti1  | 6428(3)  | 6428(3)  | 6428(3)  | 22.7(12) |
| Si1  | 5000     | 10000    | 5000     | 26.0(18) |
| Pb1  | 5400     | 10000    | 10000    | 116(5)   |
| O2   | 3823(12) | 6177(12) | 6177(12) | 24(4)    |
| O1   | 6226(10) | 8808(12) | 6226(10) | 31(3)    |
| O3   | 1810(30) | 8190(30) | 8190(30) | 140(30)  |

**Table S2.** Anisotropic Displacement Parameters ( $\text{\AA}^2 \times 10^3$ ) for Pb-exchanged ivanyukite. The Anisotropic displacement factor exponent takes the form:  $-2\pi^2[h^2a \times ^2U_{11} + 2hka \times b \times U_{12} + \dots]$ .

| Atom | U <sub>11</sub> | U <sub>22</sub> | U <sub>33</sub> | U <sub>23</sub> | U <sub>13</sub> | U <sub>12</sub> |
|------|-----------------|-----------------|-----------------|-----------------|-----------------|-----------------|
| Ti1  | 22.7(12)        | 22.7(12)        | 22.7(12)        | −0.1(12)        | −0.1(12)        | −0.1(12)        |
| Si1  | 28(3)           | 21(4)           | 28(3)           | 0               | 0               | 0               |
| Pb1  | 207(14)         | 71(3)           | 71(3)           | −29(6)          | 0               | 0               |
| O2   | 24(4)           | 24(4)           | 24(4)           | −4(4)           | 4(4)            | 4(4)            |
| O1   | 35(4)           | 23(5)           | 35(4)           | 0(3)            | −1(5)           | 0(3)            |
| O3   | 140(30)         | 140(30)         | 140(30)         | −48(16)         | 48(16)          | 48(16)          |

**Table S3.** Bond Lengths for Pb-exchanged ivanyukite.

| Atom | Atom            | Length/ $\text{\AA}$ | Atom | Atom            | Length/ $\text{\AA}$ | Atom | Atom             | Length/ $\text{\AA}$ |
|------|-----------------|----------------------|------|-----------------|----------------------|------|------------------|----------------------|
| Ti1  | O2              | 2.052(8)             | Si1  | O1 <sup>2</sup> | 1.642(10)            | O3   | Pb1 <sup>1</sup> | 2.955(8)             |
| Ti1  | O2 <sup>1</sup> | 2.052(8)             | Si1  | O1 <sup>6</sup> | 1.642(10)            | O3   | Pb1 <sup>2</sup> | 2.955(8)             |
| Ti1  | O2 <sup>2</sup> | 2.052(8)             | Si1  | O1              | 1.642(10)            | O3   | Pb1 <sup>3</sup> | 2.955(8)             |
| Ti1  | O1 <sup>4</sup> | 1.870(10)            | Si1  | O1 <sup>7</sup> | 1.642(10)            |      |                  |                      |
| Ti1  | O1 <sup>5</sup> | 1.870(10)            |      |                 |                      |      |                  |                      |
| Ti1  | O1              | 1.870(10)            |      |                 |                      |      |                  |                      |

<sup>1</sup> 1−X,1−Y,+Z; <sup>2</sup> 1−X,+Y,1−Z; <sup>3</sup> X,1−Y,1−Z; <sup>4</sup> +Y,+Z,+X; <sup>5</sup> +Z,+X,+Y; <sup>6</sup> +X,2−Y,1−Z; <sup>7</sup> 1−X,2−Y,+Z.
